# Supplementary material
Source: PubMed Central journal article supplement (PMC3736718)
Supplement: ASN.2012121149_ASN2012121149SupplementaryData.pdf [file ASN.2012121149_ASN2012121149SupplementaryData.pdf]

### **Supplemental Figure Legend:**

#### **Supplemental Figure 1: Decreased or absent LAMB2 in the GBM is accompanied by ectopic GBM accumulation of laminins $\alpha$ 1, $\alpha$ 2, and $\beta$ 1.**

(A, B) Frozen sections of *Lamb2*<sup>+/-</sup> (control), *Lamb2*<sup>-/-</sup>;Tg<sup>Hi</sup> (C321R), *Lamb2*<sup>-/-</sup>, and *Lamb2*<sup>-/-</sup>;Tg-WT kidneys were stained for laminin  $\alpha$ 1 (red in A),  $\alpha$ 2 (red in B) and agrin (green in A and B), with individual and merged images shown as indicated. Laminins  $\alpha$ 1 and  $\alpha$ 2 were co-localized with the GBM marker agrin in *Lamb2*<sup>-/-</sup>;Tg<sup>Hi</sup> and *Lamb2*<sup>-/-</sup> mice (arrows), but not in the *Lamb2*<sup>+/-</sup> and *Lamb2*<sup>-/-</sup>;Tg-WT mice. (C) Frozen kidney sections from mice of the indicated genotypes were examined by double immunofluorescence staining for laminin  $\beta$ 1 (red) and nidogen (green). The overlap of laminin  $\beta$ 1 with nidogen in *Lamb2*<sup>-/-</sup>;Tg<sup>Hi</sup> and *Lamb2*<sup>-/-</sup> mice indicates the continued presence of laminin  $\beta$ 1 in the GBM (arrows). Scale bars, 20  $\mu$ m. Some panels from Figure 3 are reshown here for clarity.

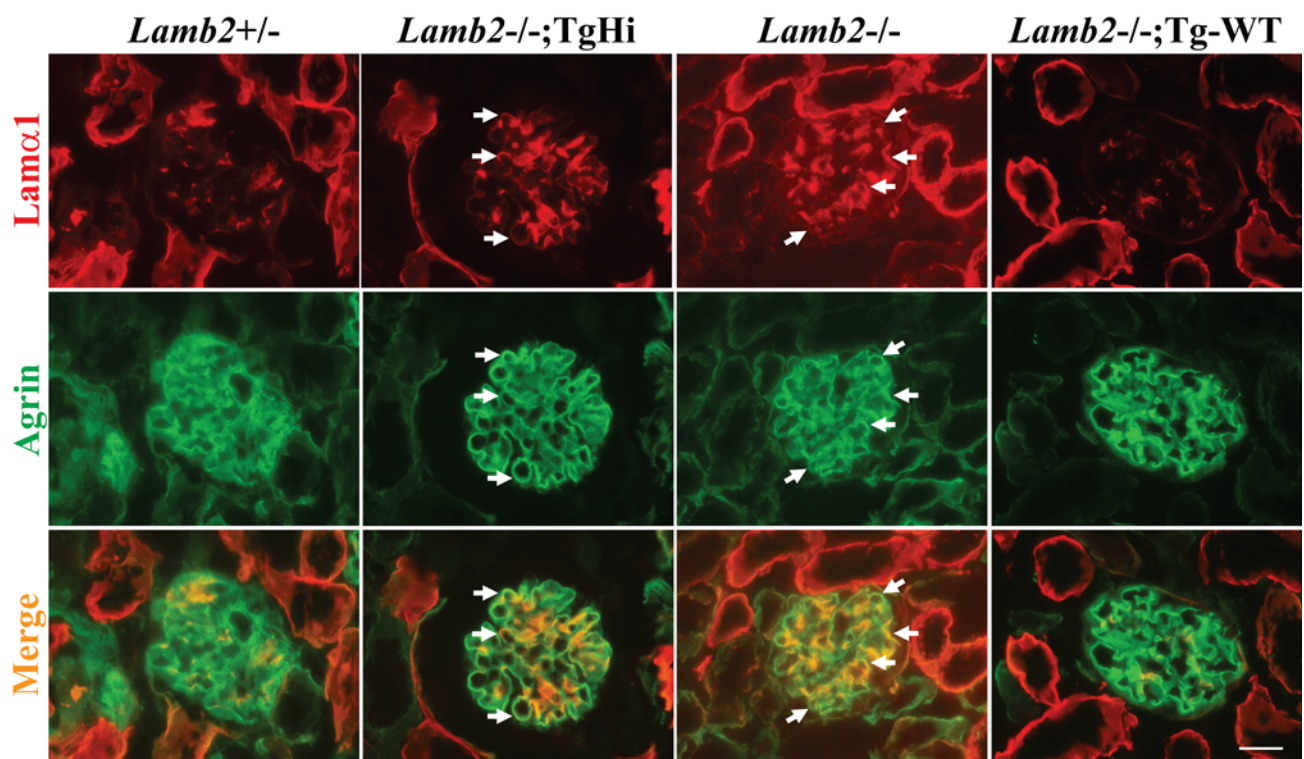

**Supplemental Figure 1 A**

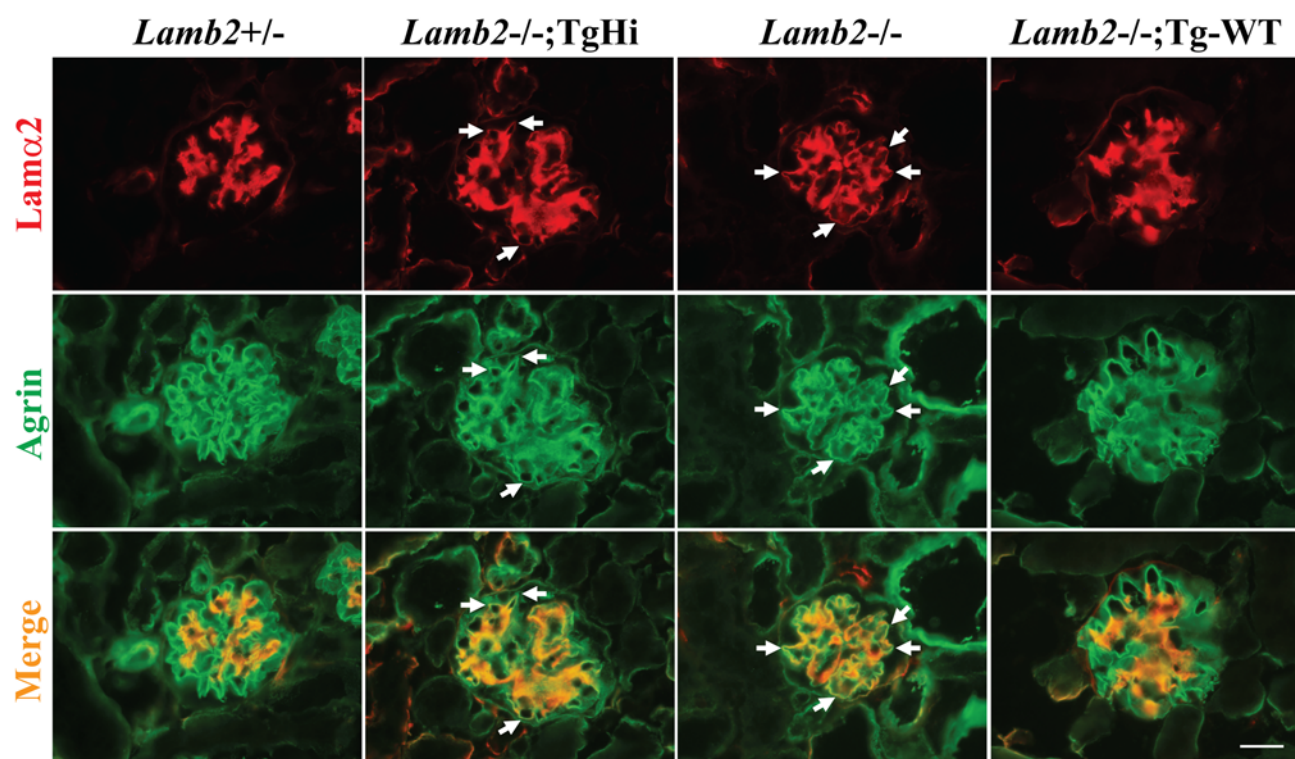

**Supplemental Figure 1 B**

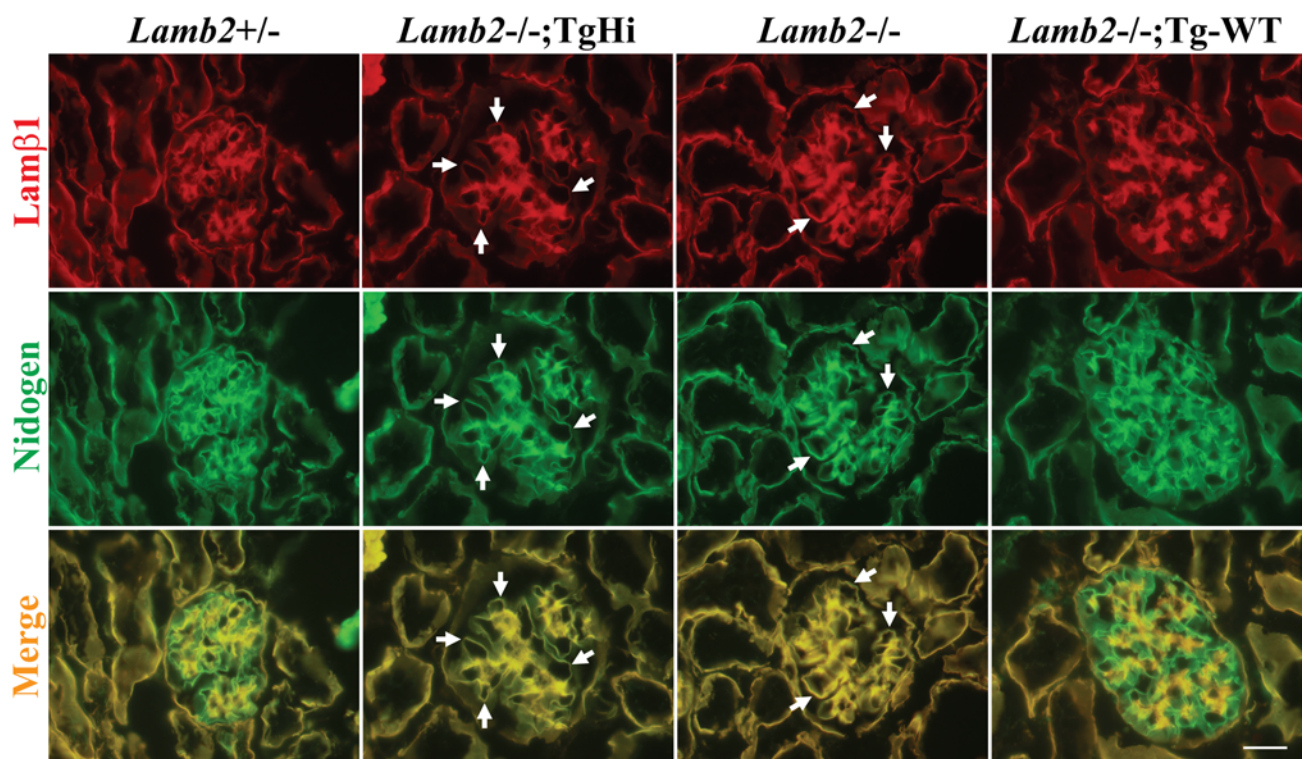

Supplemental Figure 1 C
